# Supplementary material for: A novel approach of an infrared transparent Er:Y2O3–MgO nanocomposite for eye-safe laser ceramics
Source: Royal Society of Chemistry journal article supplement (doi:10.1039/c7tc05991d), 2018-01-01
Supplement: c7tc05991d1.pdf [file c7tc05991d1.pdf]

## Electronic Supporting information

A novel approach of infrared transparent Er:Y<sub>2</sub>O<sub>3</sub>-MgO nanocomposite for eye-safe laser ceramics

Ho Jin Ma, Wook Ki Jung, Youngtae Park and Do Kyung Kim\*

\*dkkim@kaist.ac.kr

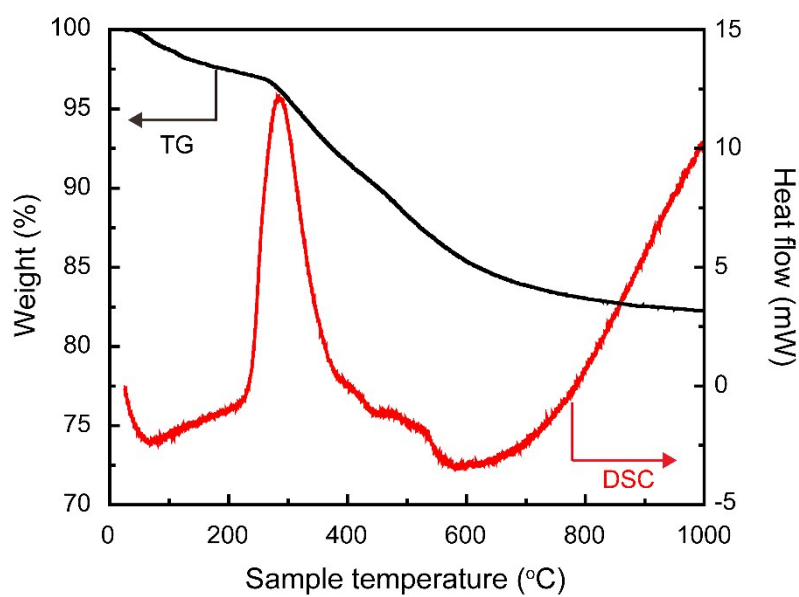

**Fig. S1** TG and DSC curves obtained from as-synthesized nanocomposite particles.
